# Supplementary material
Source: PubMed Central journal article supplement (PMC7577994)
Supplement: NIHMS1596170-supplement-1.pdf [file NIHMS1596170-supplement-1.pdf]

**Appendix**  
**Intersectionality and Health Inequities for Gender Minority Blacks in the U.S.**  
**Lett et al.**

**Appendix Table 1.** Gender Identity for Gender Minority Blacks (GMB) and Gender Minority Whites (GMW) in Study Sample

| <b>Variable</b>      | <b>GMB (N=427, Weighted N=136,586)</b> |                                  | <b>GMW (N=2,724, Weighted N=480,563)</b> |                                  |
|----------------------|----------------------------------------|----------------------------------|------------------------------------------|----------------------------------|
|                      | <b>Count (%)</b>                       | <b>Design-weighted count (%)</b> | <b>Count (%)</b>                         | <b>Design-weighted count (%)</b> |
| Transfeminine        | 202 (47.3)                             | 56,401 (41.3)                    | 1,258 (46.2)                             | 213,462 (44.4)                   |
| Transmasculine       | 148 (34.7)                             | 50,555 (37.0)                    | 901 (33.1)                               | 165,223 (34.4)                   |
| Other gender diverse | 77 (18.0)                              | 29,631 (21.7)                    | 565 (20.7)                               | 101,878 (21.2)                   |
